# Supplementary material for: Association between self-perception of aging, view of cancer and health of older patients in oncology: a one-year longitudinal study
Source: PubMed Central journal article supplement (PMC5581442; doi:10.1186/s12885-017-3607-8), 2017-09-02
Supplement: 12885_2017_3607_MOESM1_ESM.pdf [file 12885_2017_3607_MOESM1_ESM.pdf]

# Questionnaires

*Facteurs influençant le vécu des personnes en oncogériatrie*

## Anamnèse

### Informations générales

Sexe : F / M

Date de naissance : \_\_\_ / \_\_\_ / 19 \_\_\_

Nationalité : .....

### Habitat :

- A domicile
  - Seul
  - Avec un conjoint
  - Avec la famille
- Résidence de service
- Maison de repos
- Autre : .....

### Etat civil :

- Célibataire
- Marié(e) / cohabitant(e) légal(e)
- Divorcé(e)
- Séparé(e)
- Veuf/Veuve

### Niveau d'étude le plus élevé :

- Primaire
- Secondaire inférieur
  - général
  - technique
  - professionnel
- Secondaire supérieur
  - général
  - technique
  - professionnel
- Gradua : diplôme en \_\_\_\_\_
- Universitaire : diplôme en \_\_\_\_\_

## **Questionnaire AAQ** (Laidlaw et al., 2007)

*Traduction : Adam, Crespin, Masson, Missotten, 2012*

### *Instructions*

*Ce questionnaire vous demande comment vous ressentez le fait de vieillir.*

*Veillez répondre à toutes les questions. Si vous n'êtes pas certain de la réponse à donner à une question, veuillez choisir celle qui semble la plus appropriée. Ce sera souvent votre première réponse.*

*Gardez à l'esprit vos attentes, vos espoirs, vos passions et vos préoccupations. Nous vous demandons de réfléchir à votre vie en général.*

Les questions suivantes demandent à quel point vous êtes d'accord ou non avec les énoncés. Si vous êtes d'accord avec ceux-ci, entourez la réponse « Tout à fait d'accord ». Si vous n'êtes pas du tout d'accord avec les énoncés, encerclez la réponse « Pas du tout d'accord ». Si vous voulez indiquer que votre réponse se trouve quelque part entre « Tout à fait d'accord » et « Pas du tout d'accord », entourez une proposition entre les deux.

|                                                                          | Pas du tout d'accord | Pas d'accord | Incertain | D'accord | Tout à fait d'accord |
|--------------------------------------------------------------------------|----------------------|--------------|-----------|----------|----------------------|
| 1. En vieillissant, les gens sont davantage aptes à faire face à la vie. | Pas du tout d'accord | Pas d'accord | Incertain | D'accord | Tout à fait d'accord |
| 2. C'est un privilège de vivre vieux.                                    | Pas du tout d'accord | Pas d'accord | Incertain | D'accord | Tout à fait d'accord |
| 3. La vieillesse est une période de vie synonyme de solitude.            | Pas du tout d'accord | Pas d'accord | Incertain | D'accord | Tout à fait d'accord |
| 4. La sagesse vient avec l'âge.                                          | Pas du tout d'accord | Pas d'accord | Incertain | D'accord | Tout à fait d'accord |
| 5. Vieillir apporte beaucoup de choses agréables.                        | Pas du tout d'accord | Pas d'accord | Incertain | D'accord | Tout à fait d'accord |
| 6. La vieillesse est une période de vie synonyme de dépression.          | Pas du tout d'accord | Pas d'accord | Incertain | D'accord | Tout à fait d'accord |
| 7. Il est important de faire de l'exercice physique à tout âge.          | Pas du tout d'accord | Pas d'accord | Incertain | D'accord | Tout à fait d'accord |

Les questions ci-dessous demandent à quel point pour vous, les énoncés suivants sont vrais ou pas. Si ceux-ci sont extrêmement vrais pour vous, entourez la réponse « Tout à fait vrai ». Si pour vous les énoncés ne sont pas vrais, encerclez la réponse « Pas du tout vrai ». Si vous voulez indiquer que votre réponse se trouve quelque part entre « Tout à fait vrai » et « Pas du tout vrai », entourez une proposition entre les deux.

|                                                                                                    | Pas du tout vrai | Pas tellement vrai | Moyennement vrai | Plutôt vrai | Tout à fait vrai |
|----------------------------------------------------------------------------------------------------|------------------|--------------------|------------------|-------------|------------------|
| 8. Vieillir a été plus facile que ce que je pensais.                                               | Pas du tout vrai | Pas tellement vrai | Moyennement vrai | Plutôt vrai | Tout à fait vrai |
| 9. Je trouve qu'il est plus difficile de parler de mes sentiments en vieillissant.                 | Pas du tout vrai | Pas tellement vrai | Moyennement vrai | Plutôt vrai | Tout à fait vrai |
| 10. Avec l'âge, je m'accepte mieux.                                                                | Pas du tout vrai | Pas tellement vrai | Moyennement vrai | Plutôt vrai | Tout à fait vrai |
| 11. Je ne me sens pas vieux.                                                                       | Pas du tout vrai | Pas tellement vrai | Moyennement vrai | Plutôt vrai | Tout à fait vrai |
| 12. Je perçois la vieillesse principalement comme une période associée à la perte.                 | Pas du tout vrai | Pas tellement vrai | Moyennement vrai | Plutôt vrai | Tout à fait vrai |
| 13. Mon identité ne se définit pas en fonction de mon âge.                                         | Pas du tout vrai | Pas tellement vrai | Moyennement vrai | Plutôt vrai | Tout à fait vrai |
| 14. J'ai plus d'énergie que ce que j'espérais pour mon âge.                                        | Pas du tout vrai | Pas tellement vrai | Moyennement vrai | Plutôt vrai | Tout à fait vrai |
| 15. Je perds mon indépendance physique en vieillissant.                                            | Pas du tout vrai | Pas tellement vrai | Moyennement vrai | Plutôt vrai | Tout à fait vrai |
| 16. Mes problèmes de santé physique ne m'empêchent pas de faire ce que je souhaite.                | Pas du tout vrai | Pas tellement vrai | Moyennement vrai | Plutôt vrai | Tout à fait vrai |
| 17. En vieillissant, je trouve qu'il est plus difficile de se faire de nouveaux amis.              | Pas du tout vrai | Pas tellement vrai | Moyennement vrai | Plutôt vrai | Tout à fait vrai |
| 18. C'est très important pour moi de transmettre les bénéfices de mes expériences aux plus jeunes. | Pas du tout vrai | Pas tellement vrai | Moyennement vrai | Plutôt vrai | Tout à fait vrai |

|                                                                                         | Pas du tout vrai | Pas tellement vrai | Moyennement vrai | Plutôt vrai | Tout à fait vrai |
|-----------------------------------------------------------------------------------------|------------------|--------------------|------------------|-------------|------------------|
| 19. Je pense que ma vie a eu un impact.                                                 | Pas du tout vrai | Pas tellement vrai | Moyennement vrai | Plutôt vrai | Tout à fait vrai |
| 20. Je ne me sens plus aussi impliqué dans la société, maintenant que je suis plus âgé. | Pas du tout vrai | Pas tellement vrai | Moyennement vrai | Plutôt vrai | Tout à fait vrai |
| 21. J'aimerais donner un bon exemple aux plus jeunes.                                   | Pas du tout vrai | Pas tellement vrai | Moyennement vrai | Plutôt vrai | Tout à fait vrai |
| 22. Je me sens exclus de certaines choses à cause de mon âge.                           | Pas du tout vrai | Pas tellement vrai | Moyennement vrai | Plutôt vrai | Tout à fait vrai |
| 23. Ma santé est meilleure que ce que j'espérais pour mon âge.                          | Pas du tout vrai | Pas tellement vrai | Moyennement vrai | Plutôt vrai | Tout à fait vrai |
| 24. Grâce à l'exercice physique, je reste actif et en forme.                            | Pas du tout vrai | Pas tellement vrai | Moyennement vrai | Plutôt vrai | Tout à fait vrai |

## **Questionnaire SIS** (Fife & Wright, 2000)

*Traduction : Schroyen, Missotten, Adam, 2013*

### *Instructions*

*Ce questionnaire vous demande comment vous ressentez le fait d'avoir un cancer.*

*Veillez répondre à toutes les questions. Si vous n'êtes pas certain de la réponse à donner à une question, veuillez choisir celle qui semble la plus appropriée. Ce sera souvent votre première réponse.*

*Gardez à l'esprit vos espoirs, vos préoccupations, et vos expériences.*

Les questions suivantes demandent à quel point vous êtes d'accord ou non avec les énoncés. Si vous êtes d'accord avec ceux-ci, entourez la réponse « Tout à fait d'accord ». Si vous n'êtes pas du tout d'accord avec les énoncés, encerclez la réponse « Pas du tout d'accord ». Si vous voulez indiquer que votre réponse se trouve quelque part entre « Tout à fait d'accord » et « Pas du tout d'accord », entourez une proposition entre les deux.

|                                                                                                                                                                      | Tout à fait d'accord | D'accord | Pas d'accord | Pas du tout d'accord |
|----------------------------------------------------------------------------------------------------------------------------------------------------------------------|----------------------|----------|--------------|----------------------|
| 1. Les personnes avec qui je suis engagé dans des activités utiles non (ou peu) rémunérées (bénévolat, association, garde d'enfants,...) m'ont discriminé            | Tout à fait d'accord | D'accord | Pas d'accord | Pas du tout d'accord |
| 2. Certaines personnes agissent comme si j'étais moins compétent que d'habitude                                                                                      | Tout à fait d'accord | D'accord | Pas d'accord | Pas du tout d'accord |
| 3. Je sens que j'ai été traité avec moins de respect que d'habitude par les autres                                                                                   | Tout à fait d'accord | D'accord | Pas d'accord | Pas du tout d'accord |
| 4. Je sens que les autres s'inquiètent de pouvoir « attraper » ma maladie à travers un contact comme une poignée de main ou en mangeant la nourriture que je prépare | Tout à fait d'accord | D'accord | Pas d'accord | Pas du tout d'accord |
| 5. Je sens que les autres m'évitent à cause de ma maladie                                                                                                            | Tout à fait d'accord | D'accord | Pas d'accord | Pas du tout d'accord |

|                                                                                                                                             | Tout à fait d'accord | D'accord | Pas d'accord | Pas du tout d'accord |
|---------------------------------------------------------------------------------------------------------------------------------------------|----------------------|----------|--------------|----------------------|
| 6. Je sens que certains amis m'ont rejeté à cause de ma maladie                                                                             | Tout à fait d'accord | D'accord | Pas d'accord | Pas du tout d'accord |
| 7. Certains membres de ma famille m'ont rejeté à cause de ma maladie                                                                        | Tout à fait d'accord | D'accord | Pas d'accord | Pas du tout d'accord |
| 8. Je me retrouve dans des situations embarrassantes à cause de ma maladie                                                                  | Tout à fait d'accord | D'accord | Pas d'accord | Pas du tout d'accord |
| 9. A cause de ma maladie, les autres semblent bizarres et tendus quand ils sont autour de moi                                               | Tout à fait d'accord | D'accord | Pas d'accord | Pas du tout d'accord |
| 10. J'ai expérimenté des épreuves financières qui ont affecté ma vision de moi-même                                                         | Tout à fait d'accord | D'accord | Pas d'accord | Pas du tout d'accord |
| 11. La sécurité de mes activités utiles non (ou peu) rémunérées (bénévolat, association, garde d'enfants,...) a été affectée par ma maladie | Tout à fait d'accord | D'accord | Pas d'accord | Pas du tout d'accord |
| 12. J'ai expérimenté des épreuves financières qui ont affecté ma relation avec les autres                                                   | Tout à fait d'accord | D'accord | Pas d'accord | Pas du tout d'accord |
| 13. Je sens que les autres pensent que je suis à blâmer pour ma maladie                                                                     | Tout à fait d'accord | D'accord | Pas d'accord | Pas du tout d'accord |
| 14. Je ne sens pas que je peux être ouvert avec les autres à propos de ma maladie                                                           | Tout à fait d'accord | D'accord | Pas d'accord | Pas du tout d'accord |
| 15. J'ai peur que quelqu'un parle aux autres de ma maladie sans ma permission                                                               | Tout à fait d'accord | D'accord | Pas d'accord | Pas du tout d'accord |
| 16. Je sens que j'ai besoin de garder ma maladie secrète                                                                                    | Tout à fait d'accord | D'accord | Pas d'accord | Pas du tout d'accord |
| 17. Je sens que je suis au moins partiellement à blâmer pour ma maladie                                                                     | Tout à fait d'accord | D'accord | Pas d'accord | Pas du tout d'accord |
| 18. Je me sens mis à part des autres qui sont biens                                                                                         | Tout à fait d'accord | D'accord | Pas d'accord | Pas du tout d'accord |
| 19. J'ai un plus grand besoin que d'habitude de m'assurer que les autres tiennent à moi                                                     | Tout à fait d'accord | D'accord | Pas d'accord | Pas du tout d'accord |

|                                                                                             | Tout à fait d'accord | D'accord | Pas d'accord | Pas du tout d'accord |
|---------------------------------------------------------------------------------------------|----------------------|----------|--------------|----------------------|
| 20. Je me sens plus souvent seul que d'habitude                                             | Tout à fait d'accord | D'accord | Pas d'accord | Pas du tout d'accord |
| 21. A cause de ma maladie, j'ai le sentiment d'être inégal dans ma relation avec les autres | Tout à fait d'accord | D'accord | Pas d'accord | Pas du tout d'accord |
| 22. Je me sens moins compétent que je l'étais avant ma maladie                              | Tout à fait d'accord | D'accord | Pas d'accord | Pas du tout d'accord |
| 23. A cause de ma maladie, je me sens parfois inutile                                       | Tout à fait d'accord | D'accord | Pas d'accord | Pas du tout d'accord |
| 24. Des changements dans mon apparence ont affecté mes relations sociales                   | Tout à fait d'accord | D'accord | Pas d'accord | Pas du tout d'accord |



## **Questionnaire EORTC QLQ-C30** (Aaronson et al, 1993)

### *Traduction : Groupe EORTC*

Nous nous intéressons à vous et à votre santé. Répondez vous-même à toutes les questions en entourant le chiffre qui correspond le mieux à votre situation. Il n'y a pas de « bonne » ou de « mauvaise » réponse. Ces informations sont strictement confidentielles.

| <b>Au cours de la semaine passée</b>                                                                                            | <b>Pas du tout</b> | <b>Un peu</b> | <b>Assez</b> | <b>Beaucoup</b> |
|---------------------------------------------------------------------------------------------------------------------------------|--------------------|---------------|--------------|-----------------|
| 1. Avez-vous des difficultés à faire certains efforts physiques pénibles comme porter un sac à provision chargé ou une valise ? | 1                  | 2             | 3            | 4               |
| 2. Avez-vous des difficultés à faire une LONGUE promenade ?                                                                     | 1                  | 2             | 3            | 4               |
| 3. Avez-vous des difficultés à faire un PETIT tour dehors ?                                                                     | 1                  | 2             | 3            | 4               |
| 4. Etes-vous obligé(e) de rester au lit ou dans un fauteuil la majeure partie de la journée ?                                   | 1                  | 2             | 3            | 4               |
| 5. Avez-vous besoin d'aide pour manger, vous habiller, faire votre toilette ou aller aux W.C. ?                                 | 1                  | 2             | 3            | 4               |
| 6. Etes-vous limitée d'une manière ou d'une autre pour accomplir, soit votre travail, soit vos tâches habituelles chez vous ?   | 1                  | 2             | 3            | 4               |
| 7. Etes-vous totalement incapable de travailler ou d'accomplir des tâches habituelles chez vous ?                               | 1                  | 2             | 3            | 4               |

| <b>Au cours de la semaine passée</b>           | <b>Pas du tout</b> | <b>Un peu</b> | <b>Assez</b> | <b>Beaucoup</b> |
|------------------------------------------------|--------------------|---------------|--------------|-----------------|
| 8. Avez-vous eu le souffle court ?             | 1                  | 2             | 3            | 4               |
| 9. Avez-vous eu mal ?                          | 1                  | 2             | 3            | 4               |
| 10. Avez-vous eu besoin de repos ?             | 1                  | 2             | 3            | 4               |
| 11. Avez-vous eu des difficultés pour dormir ? | 1                  | 2             | 3            | 4               |
| 12. Vous êtes-vous senti(e) faible ?           | 1                  | 2             | 3            | 4               |
| 13. Avez-vous manqué d'appétit ?               | 1                  | 2             | 3            | 4               |
| 14. Avez-vous eu des nausées (mal au cœur) ?   | 1                  | 2             | 3            | 4               |
| 15. Avez-vous vomi ?                           | 1                  | 2             | 3            | 4               |
| 16. Avez-vous été constipée ?                  | 1                  | 2             | 3            | 4               |

| Au cours de la semaine passée                                                                                                                            | Pas du tout | Un peu | Assez | Beaucoup |
|----------------------------------------------------------------------------------------------------------------------------------------------------------|-------------|--------|-------|----------|
| 17. Avez-vous eu de la diarrhée ?                                                                                                                        | 1           | 2      | 3     | 4        |
| 18. Etiez-vous fatigué(e) ?                                                                                                                              | 1           | 2      | 3     | 4        |
| 19. Des douleurs ont-elles perturbées vos activités quotidiennes ?                                                                                       | 1           | 2      | 3     | 4        |
| 20. Avez-vous eu des difficultés à vous concentrer sur certaines choses par exemple pour lire le journal ou regarder la télévision ?                     | 1           | 2      | 3     | 4        |
| 21. Vous êtes-vous senti(e) tendu(e) ?                                                                                                                   | 1           | 2      | 3     | 4        |
| 22. Vous êtes-vous fait du souci ?                                                                                                                       | 1           | 2      | 3     | 4        |
| 23. Vous êtes-vous senti(e) irritable ?                                                                                                                  | 1           | 2      | 3     | 4        |
| 24. Vous êtes-vous senti(e) déprimé(e) ?                                                                                                                 | 1           | 2      | 3     | 4        |
| 25. Avez-vous eu des difficultés pour vous souvenir de certaines choses ?                                                                                | 1           | 2      | 3     | 4        |
| 26. Votre état physique ou votre traitement médical vous ont-ils gêné(e) dans votre vie FAMILIALE ?                                                      | 1           | 2      | 3     | 4        |
| 27. Votre état physique ou votre traitement médical vous ont-ils gêné(e) dans votre vie SOCIALES (par exemple sortir avec des amis, aller au cinéma,...) | 1           | 2      | 3     | 4        |
| 28. Votre état physique ou votre traitement médical vous ont-ils causé des problèmes financiers ?                                                        | 1           | 2      | 3     | 4        |

Pour les questions suivantes, veuillez répondre en entourant le chiffre entre 1 et 7 qui s'applique le mieux à votre situation.

29. Comment évalueriez-vous l'ensemble de votre ETAT PHYSIQUE au courant de la semaine passée ?

Très mauvais

Excellent

1 2 3 4 5 6 7

30. Comment évalueriez-vous l'ensemble de votre QUALITE DE VIE au cours de la semaine passée ?

Très mauvais

Excellent

1 2 3 4 5 6 7

## **MMSE** (Folstein, Folstein, & McHugh., 1975)

*Traduction : Derouesné et al, 1999*

### **Orientation**

|                                            | Score maximum | Score |
|--------------------------------------------|---------------|-------|
| En quelle année sommes-nous?               | 1             |       |
| En quelle saison sommes-nous?              | 1             |       |
| Quel mois sommes-nous?                     | 1             |       |
| Quel jour de la semaine sommes-nous?       | 1             |       |
| Le quantième sommes-nous?                  | 1             |       |
| Dans quel pays sommes-nous?                | 1             |       |
| Dans quelle province sommes-nous?          | 1             |       |
| Dans quel(le) ville / village sommes-nous? | 1             |       |
| Quel est le nom de cet hôpital?            | 1             |       |
| A quel étage sommes-nous?                  | 1             |       |

### **Apprentissage**

|                                                                                                                                                                                                               | Score maximum                                | Score |
|---------------------------------------------------------------------------------------------------------------------------------------------------------------------------------------------------------------|----------------------------------------------|-------|
| Je vais vous citer trois mots, lorsque j'aurai terminé, vous devrez les répéter. Lisez les mots à raison de 1 mot / seconde. Faites-les répéter et notez chaque mot correct.<br><br>CITRON ... CLE ... BALLON | 3<br><br>Comptez et notez le nombre d'essais |       |

### **Concentration**

|                                                                                                                                                                                                | Score maximum                  | Score |
|------------------------------------------------------------------------------------------------------------------------------------------------------------------------------------------------|--------------------------------|-------|
| Voudriez-vous soustraire 7 de 100?<br>Du résultat vous soustrayez chaque fois 7 jusqu'à ce que je vous dise "stop".<br>Comptez 1 point par soustraction exacte.<br>(93 86 79 72 65)     ... .. | 5                              |       |
| Voulez-vous épeler le mot « MONDE » à l'envers ?<br>E D N O M                                                                                                                                  | 5<br><br>Score le plus élevé : |       |

### Mémoire

|                                                                                | Score maximum | Score |
|--------------------------------------------------------------------------------|---------------|-------|
| Quels étaient les trois mots que vous deviez retenir?<br>(citron, clé, ballon) | 3             |       |

### Le langage

|                                                                                                                                                          | Score maximum | Score |
|----------------------------------------------------------------------------------------------------------------------------------------------------------|---------------|-------|
| Montrez une montre. Quel est le nom de cet objet?                                                                                                        | 1             |       |
| Montrez un crayon. Quel est le nom de cet objet?                                                                                                         | 1             |       |
| Ecoutez bien et répétez après moi: "pas de mais, de si ni de et"                                                                                         | 1             |       |
| Prenez ce papier de la main droite (prend papier : 1 point), pliez-le en deux (plie papier: 1 point) et posez-le sur vos genoux (dépose papier: 1 point) | 3             |       |
| Montrez la feuille de papier sur laquelle est écrit: "Fermez les yeux"<br>Faites ce qui est écrit sur ce papier.                                         | 1             |       |
| Ecrivez une phrase.                                                                                                                                      | 1             |       |
| Pouvez-vous recopier cette figure?                                                                                                                       | 1             |       |

**Score total (0-30) : .....**

# Fermez les yeux

## ECRIVEZ UNE PHRASE

.....

## POUVEZ-VOUS RECOPIER CETTE FIGURE

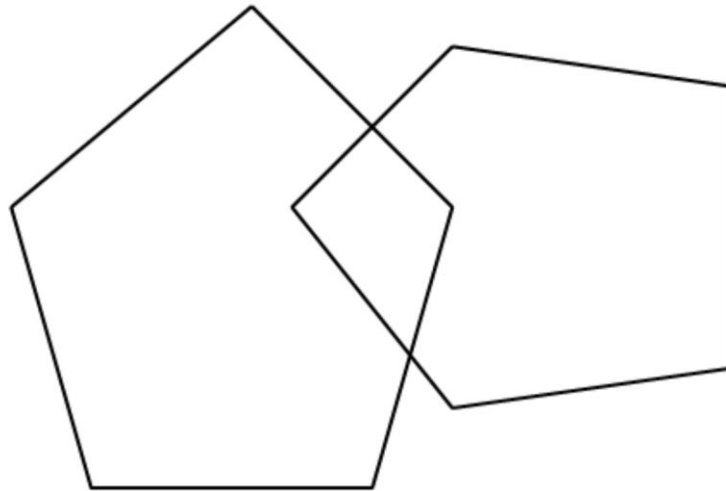

### A remplir sur base du dossier médical

| Informations oncologiques                                                                                                                                                                                                                                                                                      |          |        |
|----------------------------------------------------------------------------------------------------------------------------------------------------------------------------------------------------------------------------------------------------------------------------------------------------------------|----------|--------|
| 1. Date du diagnostic : __/__/____<br>2. Diagnostic : .....<br>3. Carcinoma staging : .....<br>4. Si le patient a un cancer du poumon, est-il fumeur ? OUI – NON<br>5. Type de diagnostic :<br><input type="radio"/> Nouveau diagnostic<br><input type="radio"/> Progressive<br><input type="radio"/> Récidive |          |        |
| Charlson Index de Comorbidité                                                                                                                                                                                                                                                                                  |          |        |
| Comorbidités                                                                                                                                                                                                                                                                                                   | Présence | Points |
| 1. Infarctus du myocarde                                                                                                                                                                                                                                                                                       |          | 1      |
| 2. Insuffisance cardiaque congestive                                                                                                                                                                                                                                                                           |          | 1      |
| 3. Maladie vasculaire périphérique                                                                                                                                                                                                                                                                             |          | 1      |
| 4. Accident vasculaire cérébral (sauf hémiplégie)                                                                                                                                                                                                                                                              |          | 1      |
| 5. Démence                                                                                                                                                                                                                                                                                                     |          | 1      |
| 6. Maladie pulmonaire chronique                                                                                                                                                                                                                                                                                |          | 1      |
| 7. Connectivite                                                                                                                                                                                                                                                                                                |          | 1      |
| 8. Ulcères oeso-gastro-duodénaux                                                                                                                                                                                                                                                                               |          | 1      |
| 9. Maladie hépatique légère                                                                                                                                                                                                                                                                                    |          | 1      |
| 10. Diabète (sans complications)                                                                                                                                                                                                                                                                               |          | 1      |
| 11. Diabète avec atteinte d'organe cible                                                                                                                                                                                                                                                                       |          | 2      |

|                                            |   |   |
|--------------------------------------------|---|---|
| 12. Hémiplegie                             |   | 2 |
| 13. Maladie rénale modérée ou sévère       |   | 2 |
| 14. Autre tumeur solide (non métastatique) |   | 2 |
| 15. Leucémie                               |   | 2 |
| 16. Lymphome, myélome multiple             |   | 2 |
| 17. Maladie hépatique modérée ou sévère    | 3 |   |
| 18. Autre tumeur métastasée                |   | 6 |
| 19. SIDA                                   |   | 6 |
| <b>SCORE TOTAL (0-37)</b>                  |   |   |



**FOLLOW-UP**

| <b>Traitement thérapeutique</b> |            |            |                                            |                                                                                                                                                                              |
|---------------------------------|------------|------------|--------------------------------------------|------------------------------------------------------------------------------------------------------------------------------------------------------------------------------|
|                                 | <b>NON</b> | <b>OUI</b> |                                            | <b>SETTING</b>                                                                                                                                                               |
| <b>Chirurgie</b>                |            |            |                                            | <input type="radio"/> Curative<br><input type="radio"/> Palliative<br><input type="radio"/> NR                                                                               |
| <b>Chimiothérapie</b>           |            |            | Laquelle :.....<br>.....<br>.....          | <input type="radio"/> Curative<br><input type="radio"/> Néo-<br>adjuvante<br><input type="radio"/> Adjuvante<br><input type="radio"/> Palliative<br><input type="radio"/> NR |
| <b>Radiothérapie</b>            |            |            |                                            | <input type="radio"/> Curative<br><input type="radio"/> Néo-<br>adjuvante<br><input type="radio"/> Adjuvante<br><input type="radio"/> Palliative<br><input type="radio"/> NR |
| <b>Hormonothérapie</b>          |            |            |                                            | <input type="radio"/> Néo-<br>adjuvante<br><input type="radio"/> Adjuvante<br><input type="radio"/> Palliative<br><input type="radio"/> NR                                   |
| <b>Autre</b>                    |            |            | Laquelle :.....<br>.....<br>.....<br>..... | <input type="radio"/> Curative<br><input type="radio"/> Néo-<br>adjuvante<br><input type="radio"/> Adjuvante<br><input type="radio"/> Palliative<br><input type="radio"/> NR |
